# Supplementary material for: Generation of human induced pluripotent stem cells (hIPSCs) from sialidosis types I and II patients with pathogenic neuraminidase 1 mutations
Source: PubMed Central journal article supplement — Stem Cell Res. Author manuscript; Available in PMC 2020 Aug 25. (PMC7446138; doi:10.1016/j.scr.2020.101836), 2020-05-06
Supplement: NIHMS1610789-supplement-1.pdf [file NIHMS1610789-supplement-1.pdf]

A

## 001, male type I sialidosis

WT GGGCCGCC<sup>\*</sup>T<sup>\*</sup>CATC<sup>\*</sup>G<sup>\*</sup>TGTGTGGCPatient GGGCCGCC<sup>\*</sup>C<sup>\*</sup>CATC<sup>\*</sup>A<sup>\*</sup>TGTGTGGC

C C T C A T C G T G  
 0 0 A 0 T A 0 J A J

WT

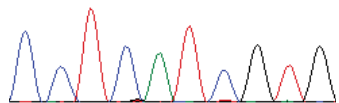

C C N C A T C N T G  
 0 0 A 0 T A 0 A A J

Patient

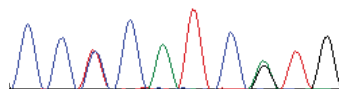

B

## 002, male type II sialidosis

WT CCCAGTGGCT<sup>\*</sup>A<sup>\*</sup>TTTCATCCCTGPatient CCCAGTGGCT<sup>\*</sup>G<sup>\*</sup>TTTCATCCCTG

T G G C T A T T T C A  
 T G G C T A T T T C A

WT

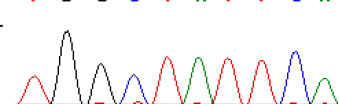

T G G C T G T T T C A  
 T G G C T A T T T C A

Patient

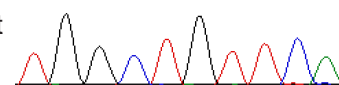

C

## 003, female type I sialidosis

WT GGAGCGGG<sup>\*</sup>G<sup>\*</sup>CGGAGTCTTCTGTPatient GGAGCGGG<sup>\*</sup>A<sup>\*</sup>CGGAGTCTTCTGT

G G A C G G A G T C  
 J J T 0 J J T J A 0

WT

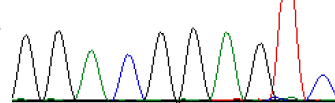

G G A C A G A G T C  
 G G A C A G A G T C

Patient

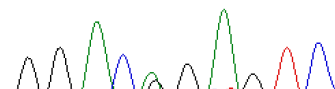WT GGAACCACTAC<sup>\*</sup>A<sup>\*</sup>CAGAGAGCATPatient GGAACCACTAC<sup>\*</sup>C<sup>\*</sup>NCTACAGNN

A C C A C T A C A C  
 A C C A C T A C A C

WT

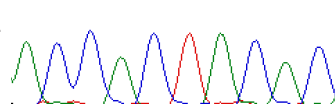

A C C A C T A C A C  
 A C C A C T A C A C

Patient

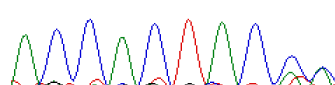

D

|                           | Reading B | Reading A | B/A      |
|---------------------------|-----------|-----------|----------|
| negative                  | 657       | 10356     | 0.063441 |
| positive                  | 328507    | 4207      | 78.08581 |
| female control iPS #1 p39 | 720       | 2157      | 0.333797 |
| male control iPS #1 p18   | 885       | 2921      | 0.302978 |
| 001 #8 p5                 | 763       | 2333      | 0.327047 |
| 002 #10 p5                | 765       | 2438      | 0.313782 |
| 003 #7 p5                 | 698       | 2126      | 0.328316 |
